# Supplementary material for: The contribution of polar C–H hydrogen bonds to anion binding
Source: Royal Society of Chemistry journal article supplement (doi:10.1039/c5nj01457c), 2015-11-23
Supplement: c5nj01457c1.pdf [file c5nj01457c1.pdf]

## Contribution of C-H Hydrogen Bonds on anion binding

Yusun Choi, Taehoon Kim, Soonmin Jang\*, Jongmin Kang\*

*Department of Chemistry, Sejong University, Seoul, 143-747, South Korea*

*kangjm@sejong.ac.kr*

|                                                                                                                                                                                                          |    |
|----------------------------------------------------------------------------------------------------------------------------------------------------------------------------------------------------------|----|
| 1. Fig S1. $^1\text{H}$ NMR spectrum of compound <b>1</b> -----                                                                                                                                          | 3  |
| 2. Fig S2. $^{13}\text{C}$ NMR spectrum of compound <b>1</b> -----                                                                                                                                       | 4  |
| 3. Fig S3. HRMS(FAB) spectrum of compound <b>1</b> -----                                                                                                                                                 | 5  |
| 4. Fig S4. $^1\text{H}$ NMR spectrum of compound <b>2</b> -----                                                                                                                                          | 6  |
| 5. Fig S5. $^{13}\text{C}$ NMR spectrum of compound <b>2</b> -----                                                                                                                                       | 7  |
| 6. Fig S6. HRMS(FAB) spectrum of compound <b>2</b> -----                                                                                                                                                 | 8  |
| 7. Fig S7. $^1\text{H}$ NMR spectrum of compound <b>3</b> -----                                                                                                                                          | 9  |
| 8. Fig S8. HRMS(FAB) spectrum of compound <b>3</b> -----                                                                                                                                                 | 10 |
| 9. Fig S9. $^1\text{H}$ NMR spectrum of compound <b>4</b> -----                                                                                                                                          | 11 |
| 10. Fig S10. $^1\text{H}$ NMR spectrum of compound <b>5</b> -----                                                                                                                                        | 12 |
| 11. Fig S11. $^{13}\text{C}$ NMR spectrum of compound <b>5</b> -----                                                                                                                                     | 13 |
| 12. Fig S12. HRMS(EI) spectrum of compound <b>5</b> -----                                                                                                                                                | 14 |
| 13. Fig S13. A family of UV-vis spectra recorded over the course of titrating a 100 $\mu\text{M}$ DMSO solution of receptor <b>1</b> with increased amounts of tetrabutylammonium bromide-----           | 15 |
| 14. Fig S14. A family of UV-vis spectra recorded over the course of titrating a 100 $\mu\text{M}$ DMSO solution of receptor <b>1</b> with increased amounts of tetrabutylammonium hydrogen sulfate ----- | 16 |
| 14. Fig S14. $^1\text{H}$ NMR spectra of 2 mM of receptor <b>1</b> containing increasing amounts of tetrabutylammonium chloride (0 –44 equiv.) in DMSO- $\text{d}_6$ -----                               | 17 |
| 15. Fig S15. $^1\text{H}$ NMR spectra of 2 mM of receptor <b>1</b> containing increasing amounts of tetrabutylammonium bromide (0 –86 equiv.) in DMSO- $\text{d}_6$ -----                                | 18 |
| 16. Fig S16. $^1\text{H}$ NMR spectra of 2 mM of receptor <b>1</b> containing increasing amounts of                                                                                                      |    |

tetrabutylammonium hydrogen sulfate (0–115 equiv.) in DMSO-d<sub>6</sub> -----19

17. Table 1. PDB file of receptor 1 in complex with H<sub>2</sub>PO<sub>4</sub><sup>-</sup> anion. -----20

18. Table 2. PDB file of receptor 1 in complex with Cl<sup>-</sup> anion.-----24

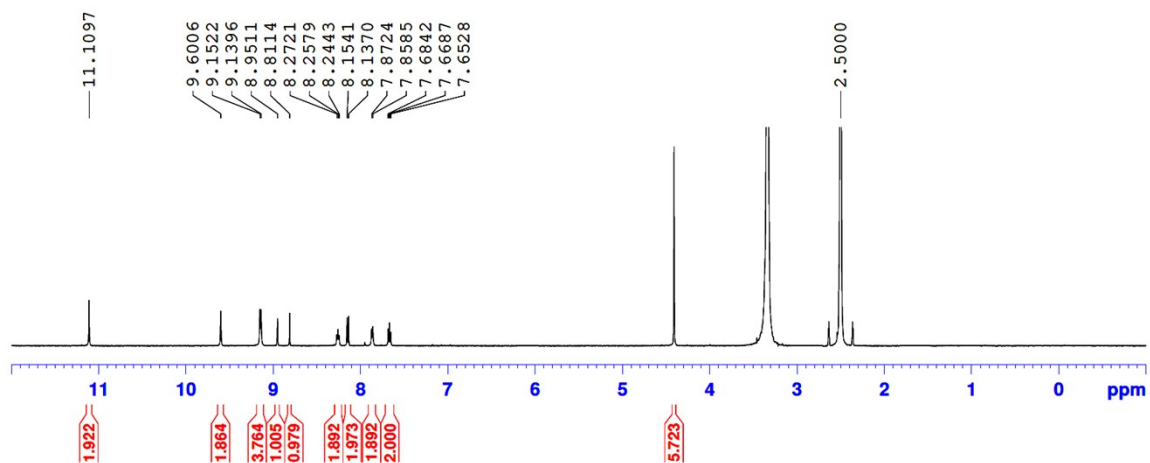

Fig S1. <sup>1</sup>H NMR spectrum of compound **1**

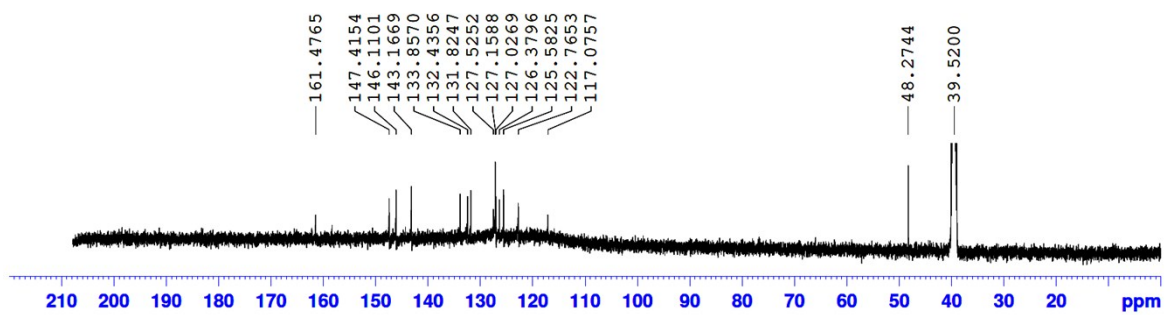

Fig S2. <sup>13</sup>C NMR spectrum of compound 1

141023\_COMPOUND1\_H\_001-c1 #103-142 RT: 1.55-2.14 Av: 40 NL: 8.61E4  
T: + c FAB Full ms [669.50-820.50]

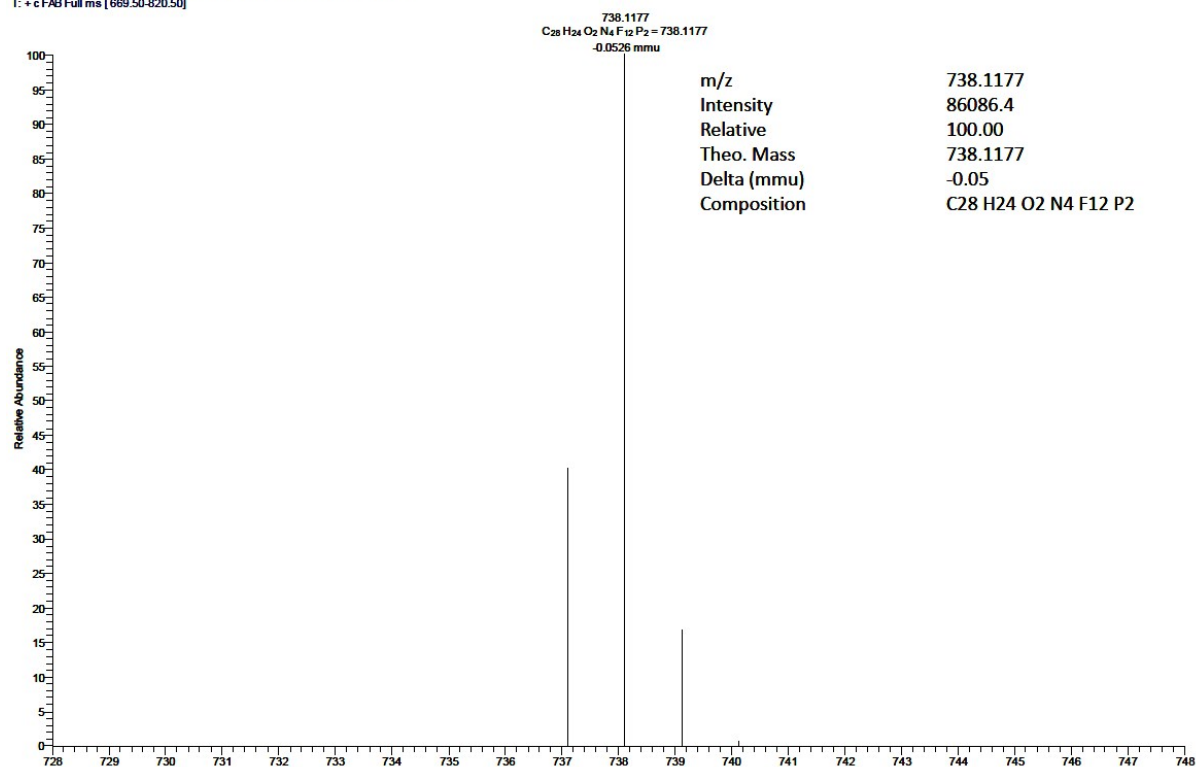

Fig S3. HRMS(FAB) spectrum of compound 1

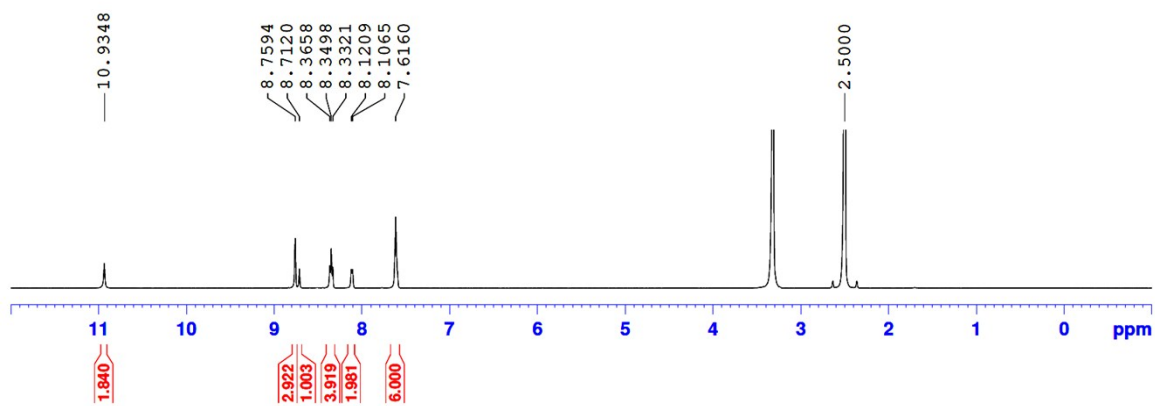

Fig S4. <sup>1</sup>H NMR spectrum of compound 2

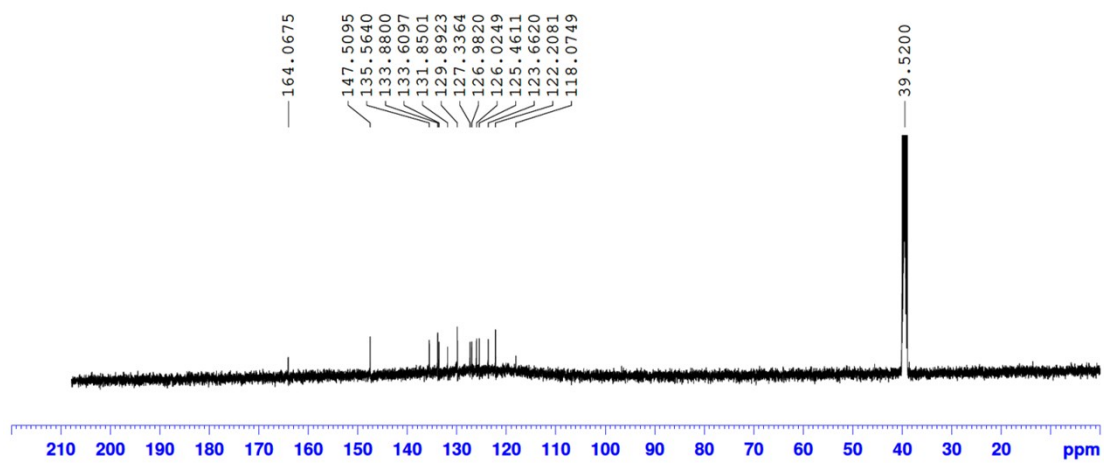

Fig S5.  $^{13}\text{C}$  NMR spectrum of compound 2

141023\_COMPOUND2\_H\_002-c1 #71-127 RT: 1.26-2.27 Av: 57 NL: 1.42E4  
T: + c FAB Full ms [449.50-600.50]

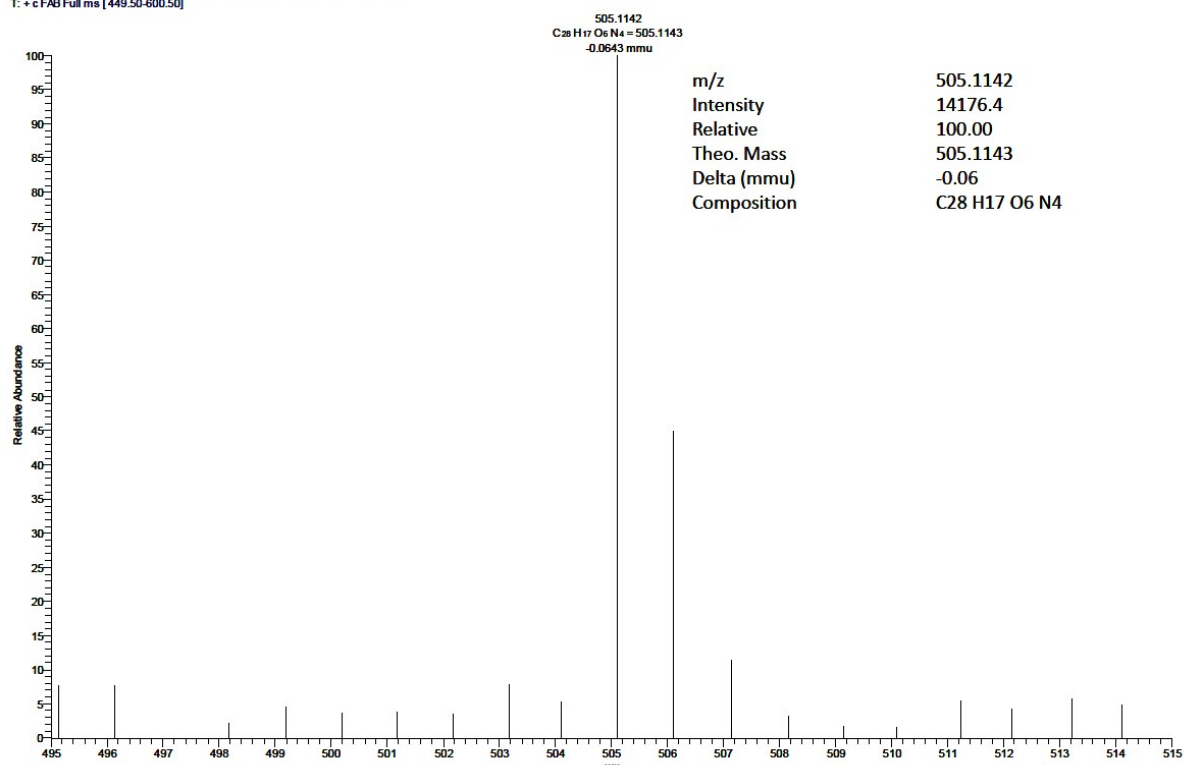

Fig S6. HRMS(FAB) spectrum of compound 2



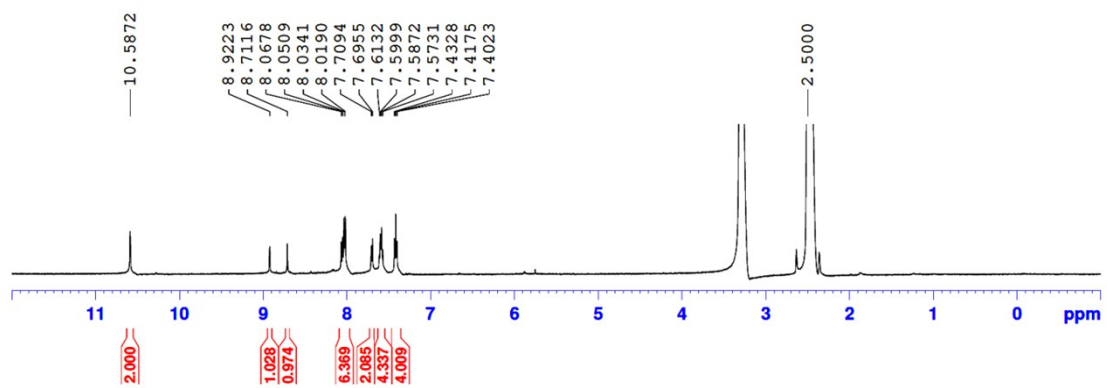

Fig S7 <sup>1</sup>H NMR spectrum of compound 3

141023\_COMPOUND3\_H\_002-e1 #32-56 RT: 0.56-0.99 AV: 25 NL: 1.07E5  
T: + cFAB Full ms [314.50-470.50]

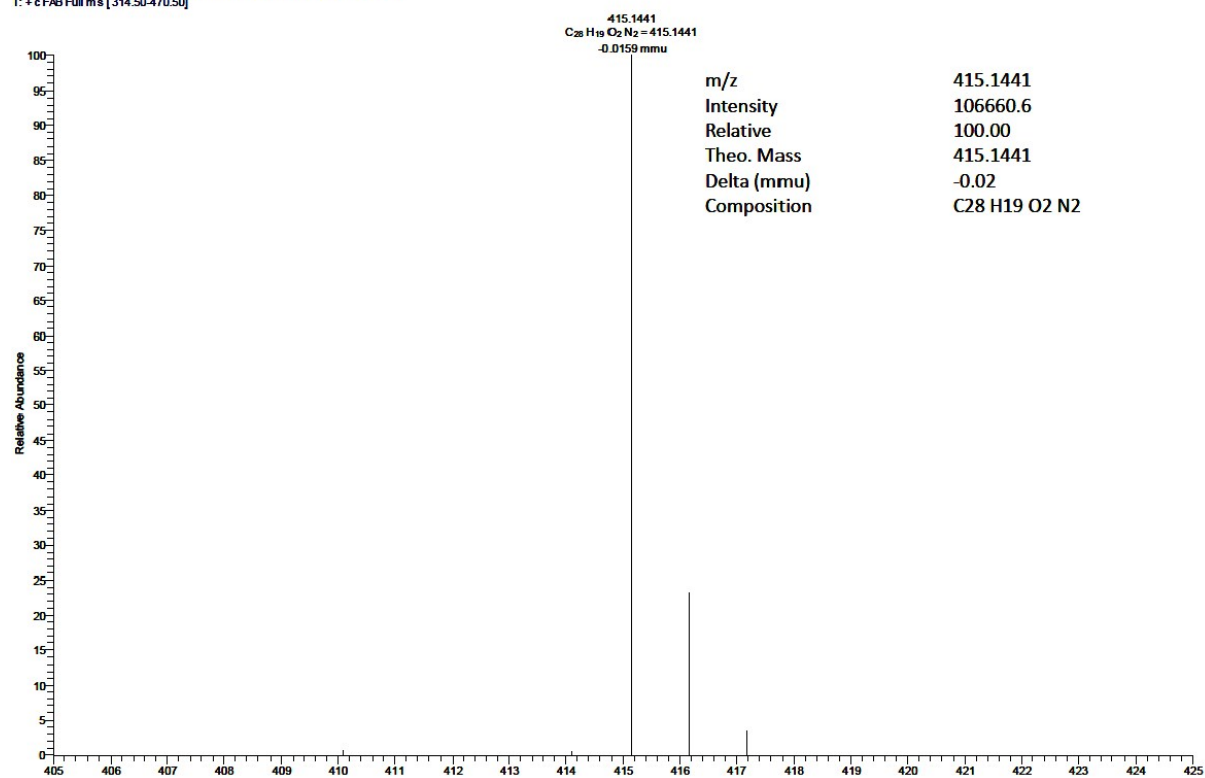

Fig S8. HRMS(FAB) spectrum of compound 3

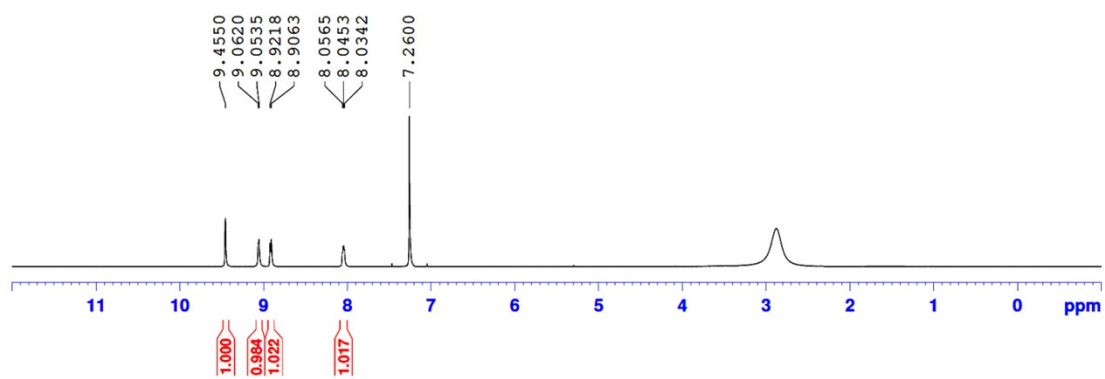

Fig S9  $^1\text{H}$  NMR spectrum of compound 4

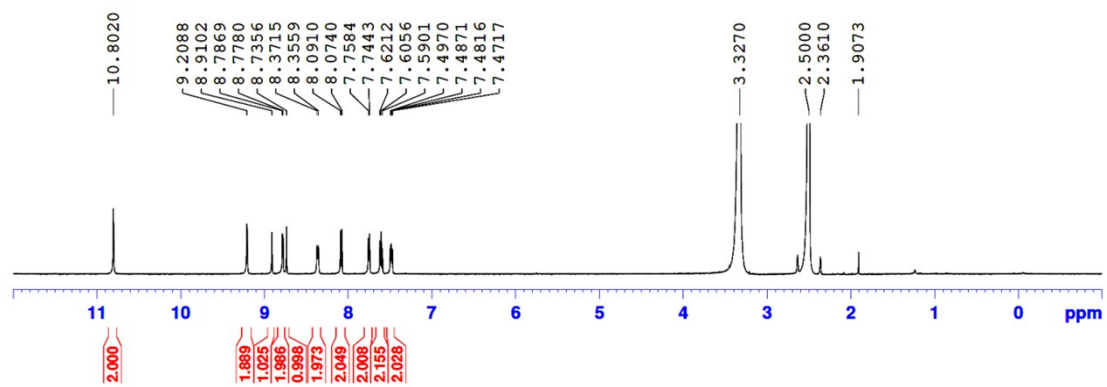

Fig S10. <sup>1</sup>H NMR spectrum of compound 5

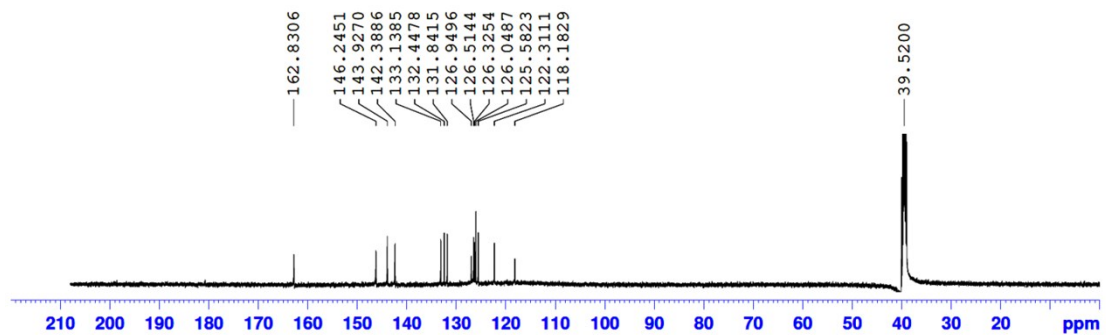

11. Fig S11.  $^{13}\text{C}$  NMR spectrum of compound 5

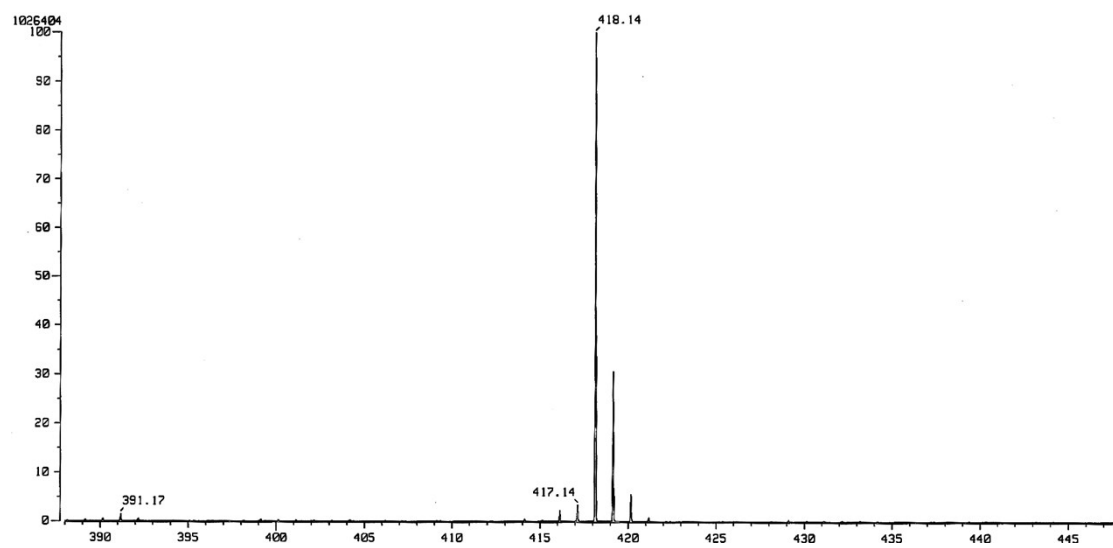

Fig S12. HRMS(EI) spectrum of compound 5

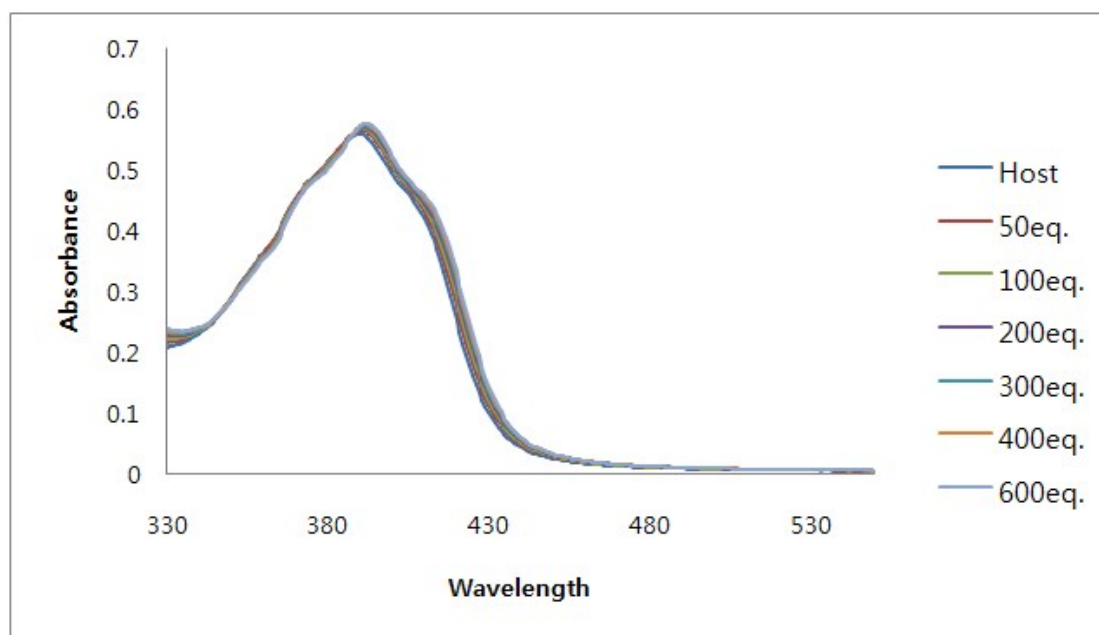

Fig S13. A family of UV-vis spectra recorded over the course of titrating a 100 μM DMSO solution of receptor **1** with increased amounts of tetrabutylammonium bromide

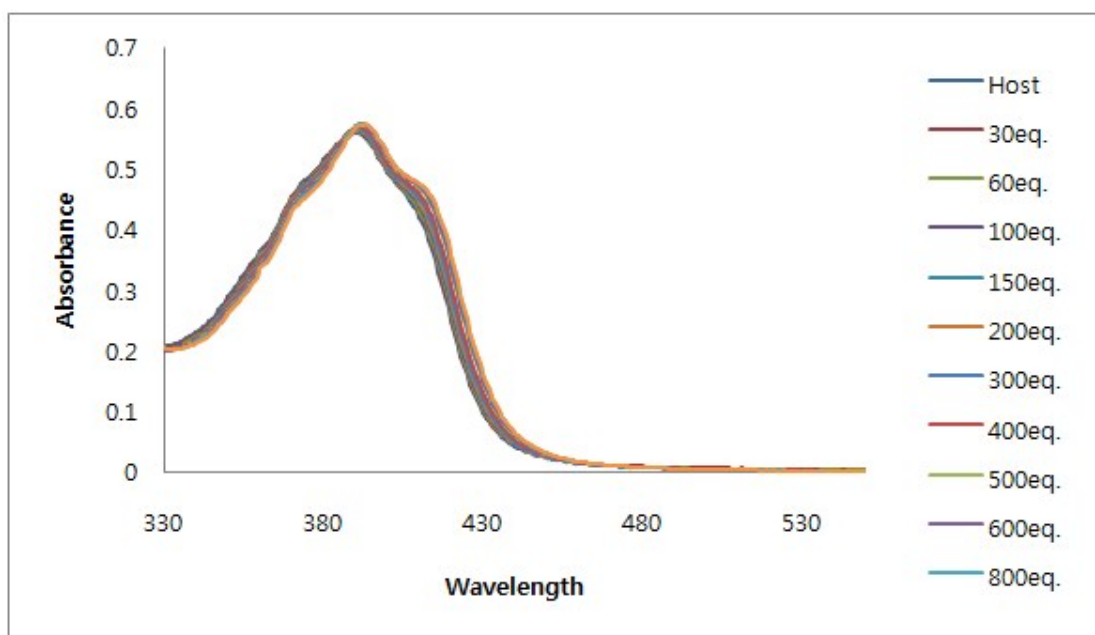

Fig S14. A family of UV-vis spectra recorded over the course of titrating a 100 μM DMSO solution of receptor **1** with increased amounts of tetrabutylammonium hydrogen sulfate



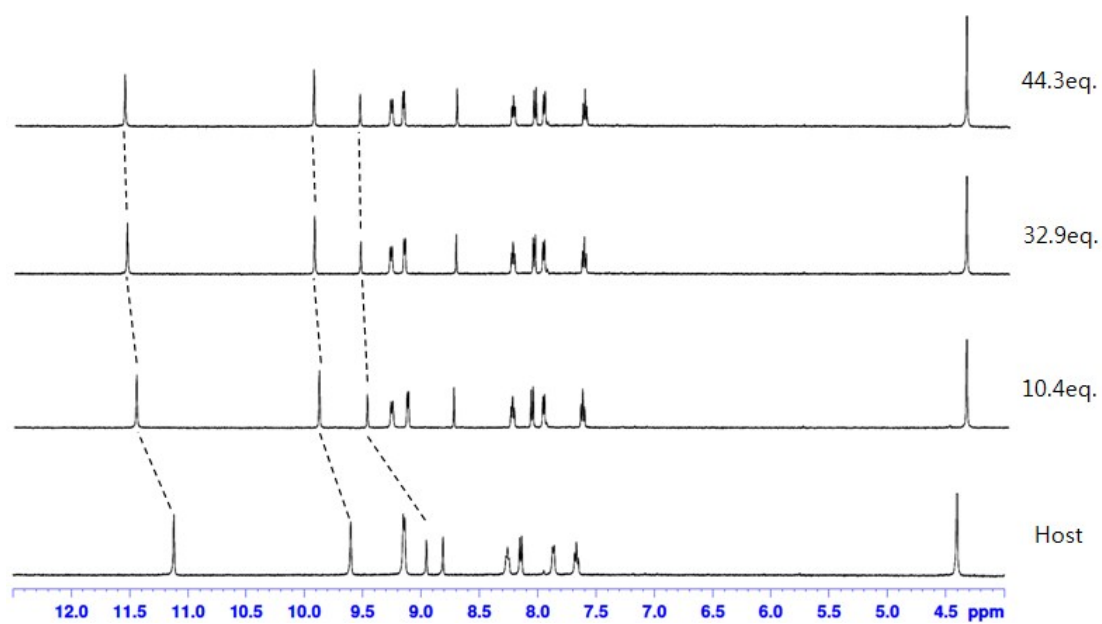

Fig S15. <sup>1</sup>H NMR spectra of 2 mM of receptor **1** containing increasing amounts of tetrabutylammonium chloride (0 –44 equiv.) in DMSO-d<sub>6</sub>

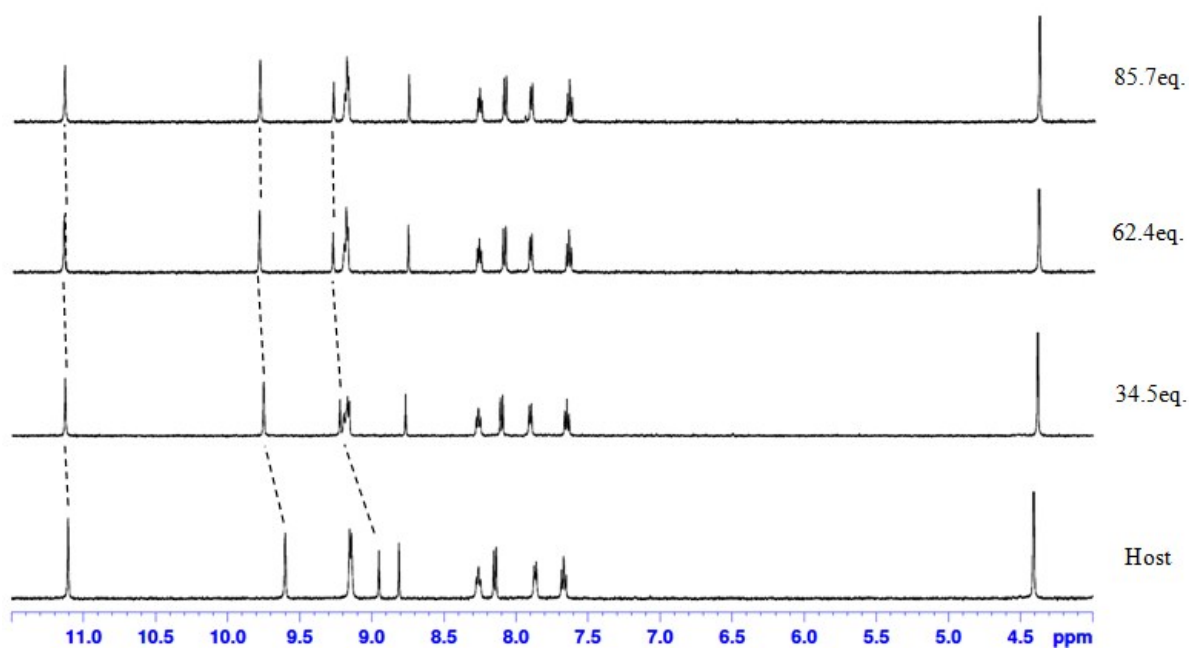

Fig S16. <sup>1</sup>H NMR spectra of 2 mM of receptor **1** containing increasing amounts of tetrabutylammonium bromide (0 –86 equiv.) in DMSO-d<sub>6</sub>

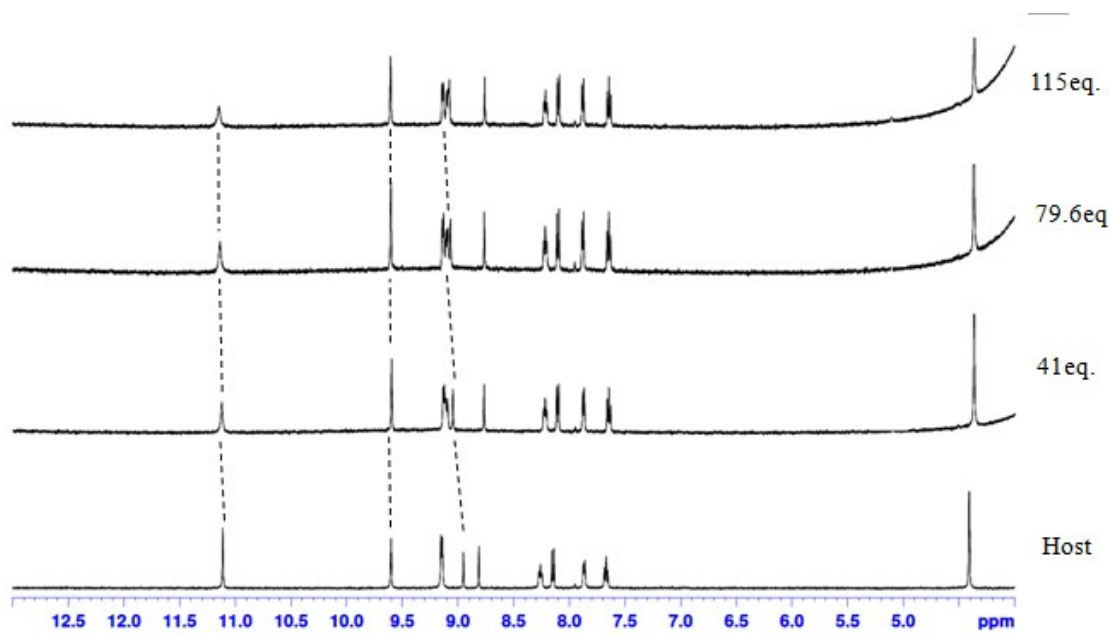

Fig S17. <sup>1</sup>H NMR spectra of 2 mM of receptor **1** containing increasing amounts of tetrabutylammonium hydrogen sulfate (0–115 equiv.) in DMSO-d<sub>6</sub>

Table 1. PDB file of receptor 1 in complex with H<sub>2</sub>PO<sub>4</sub><sup>-</sup> anion.

| TITLE  | COMPLEX1 WITH H2PO4- |   |   |        |        |        |
|--------|----------------------|---|---|--------|--------|--------|
| HETATM | 1                    | C | 0 | -3.936 | 4.000  | -0.341 |
| HETATM | 2                    | C | 0 | -4.720 | 2.893  | -0.182 |
| HETATM | 3                    | C | 0 | -4.134 | 1.592  | -0.128 |
| HETATM | 4                    | C | 0 | -2.701 | 1.453  | -0.240 |
| HETATM | 5                    | C | 0 | -1.914 | 2.652  | -0.371 |
| HETATM | 6                    | C | 0 | -2.524 | 3.880  | -0.428 |
| HETATM | 7                    | C | 0 | -4.918 | 0.443  | 0.004  |
| HETATM | 8                    | C | 0 | -2.141 | 0.169  | -0.242 |
| HETATM | 9                    | C | 0 | -2.931 | -0.981 | -0.119 |
| HETATM | 10                   | C | 0 | -4.362 | -0.839 | 0.010  |
| HETATM | 11                   | C | 0 | -5.178 | -2.007 | 0.108  |
| HETATM | 12                   | H | 0 | -6.251 | -1.885 | 0.203  |
| HETATM | 13                   | C | 0 | -4.615 | -3.251 | 0.073  |
| HETATM | 14                   | C | 0 | -3.208 | -3.404 | -0.047 |
| HETATM | 15                   | C | 0 | -2.385 | -2.312 | -0.138 |
| HETATM | 16                   | H | 0 | -5.995 | 0.549  | 0.086  |
| HETATM | 17                   | H | 0 | -4.382 | 4.986  | -0.387 |
| HETATM | 18                   | H | 0 | -5.798 | 2.982  | -0.101 |
| HETATM | 19                   | H | 0 | -1.919 | 4.770  | -0.532 |
| HETATM | 20                   | H | 0 | -1.072 | 0.061  | -0.356 |
| HETATM | 21                   | H | 0 | -5.235 | -4.137 | 0.146  |
| HETATM | 22                   | H | 0 | -2.779 | -4.397 | -0.064 |
| HETATM | 23                   | N | 0 | -0.496 | 2.541  | -0.402 |
| HETATM | 24                   | C | 0 | 0.285  | 3.178  | -1.313 |
| HETATM | 25                   | H | 0 | -0.080 | 1.975  | 0.351  |
| HETATM | 26                   | O | 0 | -0.138 | 3.830  | -2.260 |
| HETATM | 27                   | C | 0 | 1.786  | 3.059  | -1.135 |
| HETATM | 28                   | C | 0 | 2.593  | 3.419  | -2.217 |
| HETATM | 29                   | C | 0 | 2.401  | 2.674  | 0.047  |
| HETATM | 30                   | H | 0 | 2.119  | 3.739  | -3.135 |
| HETATM | 31                   | H | 0 | 1.853  | 2.365  | 0.932  |
| HETATM | 32                   | C | 0 | 4.536  | 2.975  | -0.901 |
| HETATM | 33                   | H | 0 | 5.603  | 2.922  | -0.738 |
| HETATM | 34                   | C | 0 | 3.977  | 3.367  | -2.100 |

|        |    |   |   |        |        |        |
|--------|----|---|---|--------|--------|--------|
| HETATM | 35 | N | 0 | -0.972 | -2.476 | -0.236 |
| HETATM | 36 | C | 0 | -0.389 | -3.250 | -1.187 |
| HETATM | 37 | H | 0 | -0.417 | -1.999 | 0.488  |
| HETATM | 38 | O | 0 | -0.998 | -3.832 | -2.076 |
| HETATM | 39 | C | 0 | 1.122  | -3.383 | -1.145 |
| HETATM | 40 | C | 0 | 1.739  | -4.004 | -2.233 |
| HETATM | 41 | C | 0 | 1.918  | -2.953 | -0.092 |
| HETATM | 42 | H | 0 | 1.120  | -4.350 | -3.050 |
| HETATM | 43 | H | 0 | 1.526  | -2.458 | 0.793  |
| HETATM | 44 | C | 0 | 3.863  | -3.719 | -1.181 |
| HETATM | 45 | H | 0 | 4.938  | -3.817 | -1.125 |
| HETATM | 46 | C | 0 | 3.119  | -4.168 | -2.251 |
| HETATM | 47 | H | 0 | 3.620  | -4.640 | -3.085 |
| HETATM | 48 | H | 0 | 4.624  | 3.630  | -2.925 |
| HETATM | 49 | C | 0 | 4.368  | 2.267  | 1.440  |
| HETATM | 50 | H | 0 | 3.706  | 1.582  | 1.965  |
| HETATM | 51 | H | 0 | 5.322  | 1.786  | 1.243  |
| HETATM | 52 | H | 0 | 4.520  | 3.173  | 2.027  |
| HETATM | 53 | C | 0 | 4.074  | -2.687 | 1.028  |
| HETATM | 54 | H | 0 | 5.023  | -2.302 | 0.662  |
| HETATM | 55 | H | 0 | 3.537  | -1.906 | 1.557  |
| HETATM | 56 | H | 0 | 4.243  | -3.540 | 1.684  |
| HETATM | 57 | N | 0 | 3.256  | -3.125 | -0.130 |
| HETATM | 58 | N | 0 | 3.747  | 2.640  | 0.143  |
| HETATM | 59 | P | 0 | 0.725  | -0.037 | 2.603  |
| HETATM | 60 | O | 0 | 0.504  | 1.251  | 1.856  |
| HETATM | 61 | O | 0 | 0.389  | -1.358 | 1.949  |
| HETATM | 62 | O | 0 | 2.302  | 0.005  | 3.044  |
| HETATM | 63 | H | 0 | 2.539  | -0.685 | 3.676  |
| HETATM | 64 | O | 0 | -0.013 | 0.027  | 4.059  |
| HETATM | 65 | H | 0 | -0.686 | -0.660 | 4.135  |

END

|         |   |   |   |    |
|---------|---|---|---|----|
| CONNECT | 1 | 2 | 6 | 17 |
| CONNECT | 2 | 1 | 3 | 18 |
| CONNECT | 3 | 2 | 4 | 7  |
| CONNECT | 4 | 3 | 5 | 8  |
| CONNECT | 5 | 4 | 6 | 23 |
| CONNECT | 6 | 1 | 5 | 19 |

|        |    |    |    |    |
|--------|----|----|----|----|
| CONECT | 7  | 3  | 10 | 16 |
| CONECT | 8  | 4  | 9  | 20 |
| CONECT | 9  | 8  | 10 | 15 |
| CONECT | 10 | 7  | 9  | 11 |
| CONECT | 11 | 10 | 12 | 13 |
| CONECT | 12 | 11 |    |    |
| CONECT | 13 | 11 | 14 | 21 |
| CONECT | 14 | 13 | 15 | 22 |
| CONECT | 15 | 14 | 9  | 35 |
| CONECT | 16 | 7  |    |    |
| CONECT | 17 | 1  |    |    |
| CONECT | 18 | 2  |    |    |
| CONECT | 19 | 6  |    |    |
| CONECT | 20 | 8  |    |    |
| CONECT | 21 | 13 |    |    |
| CONECT | 22 | 14 |    |    |
| CONECT | 23 | 5  | 24 | 25 |
| CONECT | 24 | 23 | 26 | 27 |
| CONECT | 25 | 23 |    |    |
| CONECT | 26 | 24 |    |    |
| CONECT | 27 | 24 | 28 | 29 |
| CONECT | 28 | 27 | 30 | 34 |
| CONECT | 29 | 27 | 31 | 58 |
| CONECT | 30 | 28 |    |    |
| CONECT | 31 | 29 |    |    |
| CONECT | 32 | 33 | 34 | 58 |
| CONECT | 33 | 32 |    |    |
| CONECT | 34 | 28 | 32 | 48 |
| CONECT | 35 | 15 | 36 | 37 |
| CONECT | 36 | 35 | 38 | 39 |
| CONECT | 37 | 35 |    |    |
| CONECT | 38 | 36 |    |    |
| CONECT | 39 | 36 | 40 | 41 |
| CONECT | 40 | 39 | 42 | 46 |
| CONECT | 41 | 39 | 43 | 57 |
| CONECT | 42 | 40 |    |    |
| CONECT | 43 | 41 |    |    |
| CONECT | 44 | 45 | 46 | 57 |

|        |    |    |    |    |    |
|--------|----|----|----|----|----|
| CONECT | 45 | 44 |    |    |    |
| CONECT | 46 | 40 | 44 | 47 |    |
| CONECT | 47 | 46 |    |    |    |
| CONECT | 48 | 34 |    |    |    |
| CONECT | 49 | 50 | 51 | 52 | 58 |
| CONECT | 50 | 49 |    |    |    |
| CONECT | 51 | 49 |    |    |    |
| CONECT | 52 | 49 |    |    |    |
| CONECT | 53 | 54 | 55 | 56 | 57 |
| CONECT | 54 | 53 |    |    |    |
| CONECT | 55 | 53 |    |    |    |
| CONECT | 56 | 53 |    |    |    |
| CONECT | 57 | 41 | 44 | 53 |    |
| CONECT | 58 | 29 | 32 | 49 |    |
| CONECT | 59 | 60 | 61 | 62 | 64 |
| CONECT | 60 | 59 |    |    |    |
| CONECT | 61 | 59 |    |    |    |
| CONECT | 62 | 59 | 63 |    |    |
| CONECT | 63 | 62 |    |    |    |
| CONECT | 64 | 59 | 65 |    |    |
| CONECT | 65 | 64 |    |    |    |

Table 2. PDB file of receptor 1 in complex with Cl<sup>-</sup> anion.

| TITLE  | COMPLEX1 WITH CL- |   |   |        |        |        |
|--------|-------------------|---|---|--------|--------|--------|
| HETATM | 1                 | C | 0 | -0.183 | 4.204  | 3.648  |
| HETATM | 2                 | C | 0 | -0.256 | 4.889  | 2.468  |
| HETATM | 3                 | C | 0 | -0.205 | 4.191  | 1.224  |
| HETATM | 4                 | C | 0 | -0.062 | 2.755  | 1.224  |
| HETATM | 5                 | C | 0 | -0.026 | 2.074  | 2.493  |
| HETATM | 6                 | C | 0 | -0.078 | 2.788  | 3.664  |
| HETATM | 7                 | C | 0 | -0.266 | 4.864  | 0.000  |
| HETATM | 8                 | C | 0 | 0.035  | 2.084  | 0.000  |
| HETATM | 9                 | C | 0 | -0.062 | 2.755  | -1.224 |
| HETATM | 10                | C | 0 | -0.205 | 4.191  | -1.224 |
| HETATM | 11                | C | 0 | -0.256 | 4.889  | -2.468 |
| HETATM | 12                | H | 0 | -0.352 | 5.969  | -2.457 |
| HETATM | 13                | C | 0 | -0.183 | 4.204  | -3.648 |
| HETATM | 14                | C | 0 | -0.078 | 2.788  | -3.664 |
| HETATM | 15                | C | 0 | -0.026 | 2.074  | -2.493 |
| HETATM | 16                | H | 0 | -0.359 | 5.945  | 0.000  |
| HETATM | 17                | H | 0 | -0.221 | 4.734  | 4.592  |
| HETATM | 18                | H | 0 | -0.352 | 5.969  | 2.457  |
| HETATM | 19                | H | 0 | -0.048 | 2.268  | 4.610  |
| HETATM | 20                | H | 0 | 0.195  | 1.017  | 0.000  |
| HETATM | 21                | H | 0 | -0.221 | 4.734  | -4.592 |
| HETATM | 22                | H | 0 | -0.048 | 2.268  | -4.610 |
| HETATM | 23                | N | 0 | 0.031  | 0.655  | 2.502  |
| HETATM | 24                | C | 0 | 0.793  | -0.083 | 3.359  |
| HETATM | 25                | H | 0 | -0.480 | 0.166  | 1.765  |
| HETATM | 26                | O | 0 | 1.574  | 0.375  | 4.179  |
| HETATM | 27                | C | 0 | 0.639  | -1.581 | 3.248  |
| HETATM | 28                | C | 0 | 1.730  | -2.390 | 3.575  |
| HETATM | 29                | C | 0 | -0.558 | -2.190 | 2.908  |
| HETATM | 30                | H | 0 | 2.659  | -1.924 | 3.875  |
| HETATM | 31                | H | 0 | -1.455 | -1.642 | 2.666  |
| HETATM | 32                | C | 0 | 0.395  | -4.326 | 3.148  |
| HETATM | 33                | H | 0 | 0.233  | -5.392 | 3.082  |
| HETATM | 34                | C | 0 | 1.607  | -3.772 | 3.511  |



|        |    |    |   |        |        |        |
|--------|----|----|---|--------|--------|--------|
| HETATM | 35 | N  | 0 | 0.031  | 0.655  | -2.502 |
| HETATM | 36 | C  | 0 | 0.793  | -0.083 | -3.359 |
| HETATM | 37 | H  | 0 | -0.480 | 0.166  | -1.765 |
| HETATM | 38 | O  | 0 | 1.574  | 0.375  | -4.179 |
| HETATM | 39 | C  | 0 | 0.639  | -1.581 | -3.248 |
| HETATM | 40 | C  | 0 | 1.730  | -2.390 | -3.575 |
| HETATM | 41 | C  | 0 | -0.558 | -2.190 | -2.908 |
| HETATM | 42 | H  | 0 | 2.659  | -1.924 | -3.875 |
| HETATM | 43 | H  | 0 | -1.455 | -1.642 | -2.666 |
| HETATM | 44 | C  | 0 | 0.395  | -4.326 | -3.148 |
| HETATM | 45 | H  | 0 | 0.233  | -5.392 | -3.082 |
| HETATM | 46 | C  | 0 | 1.607  | -3.772 | -3.511 |
| HETATM | 47 | Cl | 0 | -1.684 | -1.021 | 0.000  |
| HETATM | 48 | H  | 0 | 2.438  | -4.424 | -3.741 |
| HETATM | 49 | H  | 0 | 2.438  | -4.424 | 3.741  |
| HETATM | 50 | C  | 0 | -1.969 | -4.131 | 2.499  |
| HETATM | 51 | H  | 0 | -2.343 | -3.616 | 1.615  |
| HETATM | 52 | H  | 0 | -1.829 | -5.187 | 2.288  |
| HETATM | 53 | H  | 0 | -2.659 | -4.005 | 3.332  |
| HETATM | 54 | C  | 0 | -1.969 | -4.131 | -2.499 |
| HETATM | 55 | H  | 0 | -1.829 | -5.187 | -2.288 |
| HETATM | 56 | H  | 0 | -2.343 | -3.616 | -1.615 |
| HETATM | 57 | H  | 0 | -2.659 | -4.005 | -3.332 |
| HETATM | 58 | N  | 0 | -0.661 | -3.536 | -2.863 |
| HETATM | 59 | N  | 0 | -0.661 | -3.536 | 2.863  |

END

|        |    |    |    |    |
|--------|----|----|----|----|
| CONECT | 1  | 2  | 6  | 17 |
| CONECT | 2  | 1  | 3  | 18 |
| CONECT | 3  | 2  | 4  | 7  |
| CONECT | 4  | 3  | 5  | 8  |
| CONECT | 5  | 4  | 6  | 23 |
| CONECT | 6  | 5  | 1  | 19 |
| CONECT | 7  | 3  | 10 | 16 |
| CONECT | 8  | 4  | 9  | 20 |
| CONECT | 9  | 8  | 10 | 15 |
| CONECT | 10 | 9  | 7  | 11 |
| CONECT | 11 | 10 | 12 | 13 |
| CONECT | 12 | 11 |    |    |

|        |    |    |    |    |    |
|--------|----|----|----|----|----|
| CONECT | 13 | 11 | 14 | 21 |    |
| CONECT | 14 | 13 | 15 | 22 |    |
| CONECT | 15 | 14 | 9  | 35 |    |
| CONECT | 16 | 7  |    |    |    |
| CONECT | 17 | 1  |    |    |    |
| CONECT | 18 | 2  |    |    |    |
| CONECT | 19 | 6  |    |    |    |
| CONECT | 20 | 8  |    |    |    |
| CONECT | 21 | 13 |    |    |    |
| CONECT | 22 | 14 |    |    |    |
| CONECT | 23 | 5  | 24 | 25 |    |
| CONECT | 24 | 23 | 26 | 27 |    |
| CONECT | 25 | 23 |    |    |    |
| CONECT | 26 | 24 |    |    |    |
| CONECT | 27 | 24 | 28 | 29 |    |
| CONECT | 28 | 27 | 30 | 34 |    |
| CONECT | 29 | 27 | 31 | 59 |    |
| CONECT | 30 | 28 |    |    |    |
| CONECT | 31 | 29 |    |    |    |
| CONECT | 32 | 33 | 34 | 59 |    |
| CONECT | 33 | 32 |    |    |    |
| CONECT | 34 | 32 | 28 | 49 |    |
| CONECT | 35 | 15 | 36 | 37 |    |
| CONECT | 36 | 35 | 38 | 39 |    |
| CONECT | 37 | 35 |    |    |    |
| CONECT | 38 | 36 |    |    |    |
| CONECT | 39 | 36 | 40 | 41 |    |
| CONECT | 40 | 39 | 42 | 46 |    |
| CONECT | 41 | 39 | 43 | 58 |    |
| CONECT | 42 | 40 |    |    |    |
| CONECT | 43 | 41 |    |    |    |
| CONECT | 44 | 45 | 46 | 58 |    |
| CONECT | 45 | 44 |    |    |    |
| CONECT | 46 | 44 | 40 | 48 |    |
| CONECT | 48 | 46 |    |    |    |
| CONECT | 49 | 34 |    |    |    |
| CONECT | 50 | 51 | 52 | 53 | 59 |
| CONECT | 51 | 50 |    |    |    |

|        |    |    |    |    |    |
|--------|----|----|----|----|----|
| CONECT | 52 | 50 |    |    |    |
| CONECT | 53 | 50 |    |    |    |
| CONECT | 54 | 55 | 56 | 57 | 58 |
| CONECT | 55 | 54 |    |    |    |
| CONECT | 56 | 54 |    |    |    |
| CONECT | 57 | 54 |    |    |    |
| CONECT | 58 | 54 | 41 | 44 |    |
| CONECT | 59 | 50 | 29 | 32 |    |
